# Supplementary material
Source: PubMed Central journal article supplement (PMC4241147)
Supplement: NIHMS636720-supplement-2.pdf [file NIHMS636720-supplement-2.pdf]

| <b>Subject</b> | <b>Age</b> | <b>Gender</b> | <b>Autolysis T</b> | <b>Clinical diagnosis</b>                                   | <b>Neuropathological diagnosis</b>                        |
|----------------|------------|---------------|--------------------|-------------------------------------------------------------|-----------------------------------------------------------|
| 2357           | 91         | F             | 12.0               | Coronary heart disease, Atrial fibrillation, Hypothyroidism | normal                                                    |
| 3750           | 77         | M             | 12.3               | Congestive heart failure                                    | normal                                                    |
| 3795           | 72         | F             | 14.0               | Ovarian and Peritonea cancer                                | normal, atherosclerosis, no evidence of metastasis cancer |

### **Supplementary Table 1**

#### **Characteristics of human brain samples.**

Note that all subjects were selected to be non-smokers without any documented psychiatric disorder (based on DSM-IV), in order to compare the identification of CRF neurons in the VTA with the results obtained in naïve mice.
